# Supplementary material
Source: publisher figshare collection journal article supplement (https://frontiersin.figshare.com/ndownloader/files/17764454)
Supplement: Supplementary file [file 17764454]

**Supplementary Table 1.** Pilot study using 17 isolates (marked by \* in Table 1) extracted at the NIH at Centers 1 and 2 evaluating pre- and post- instrument optimization using routine spectral acquisition methods for each site, and performance on the instrument at Bruker US headquarters at Billerica, MA.

| Description                       | Acquisition method | Log score $\geq 1.7$ (%) | p-value                                                                                  |
|-----------------------------------|--------------------|--------------------------|------------------------------------------------------------------------------------------|
| Center 1 (NIH) pre-optimization   | NIH method         | 76                       | <p>0.3</p> <p>0.2</p> <p>0.0002</p> <p>0.001</p> <p>&lt;0.0001</p> <p>1.0</p> <p>1.0</p> |
| Center 1 (NIH) post-optimization  | NIH method         | 94                       |                                                                                          |
| Center 2 pre-optimization         | MBT_AutoX          | 59                       |                                                                                          |
| Center 2 post-optimization        | MBT_AutoX          | 31                       |                                                                                          |
| Center 2 extracts returned to NIH | NIH method         | 88                       |                                                                                          |
| Bruker US Headquarters            | MBT_AutoX          | 100                      |                                                                                          |
